# Supplementary material
Source: Springer Nature journal article supplement (https://www.springermedizin.de/resource/supplementary/13012_2013_731_MOESM3_ESM.pdf/9630550)

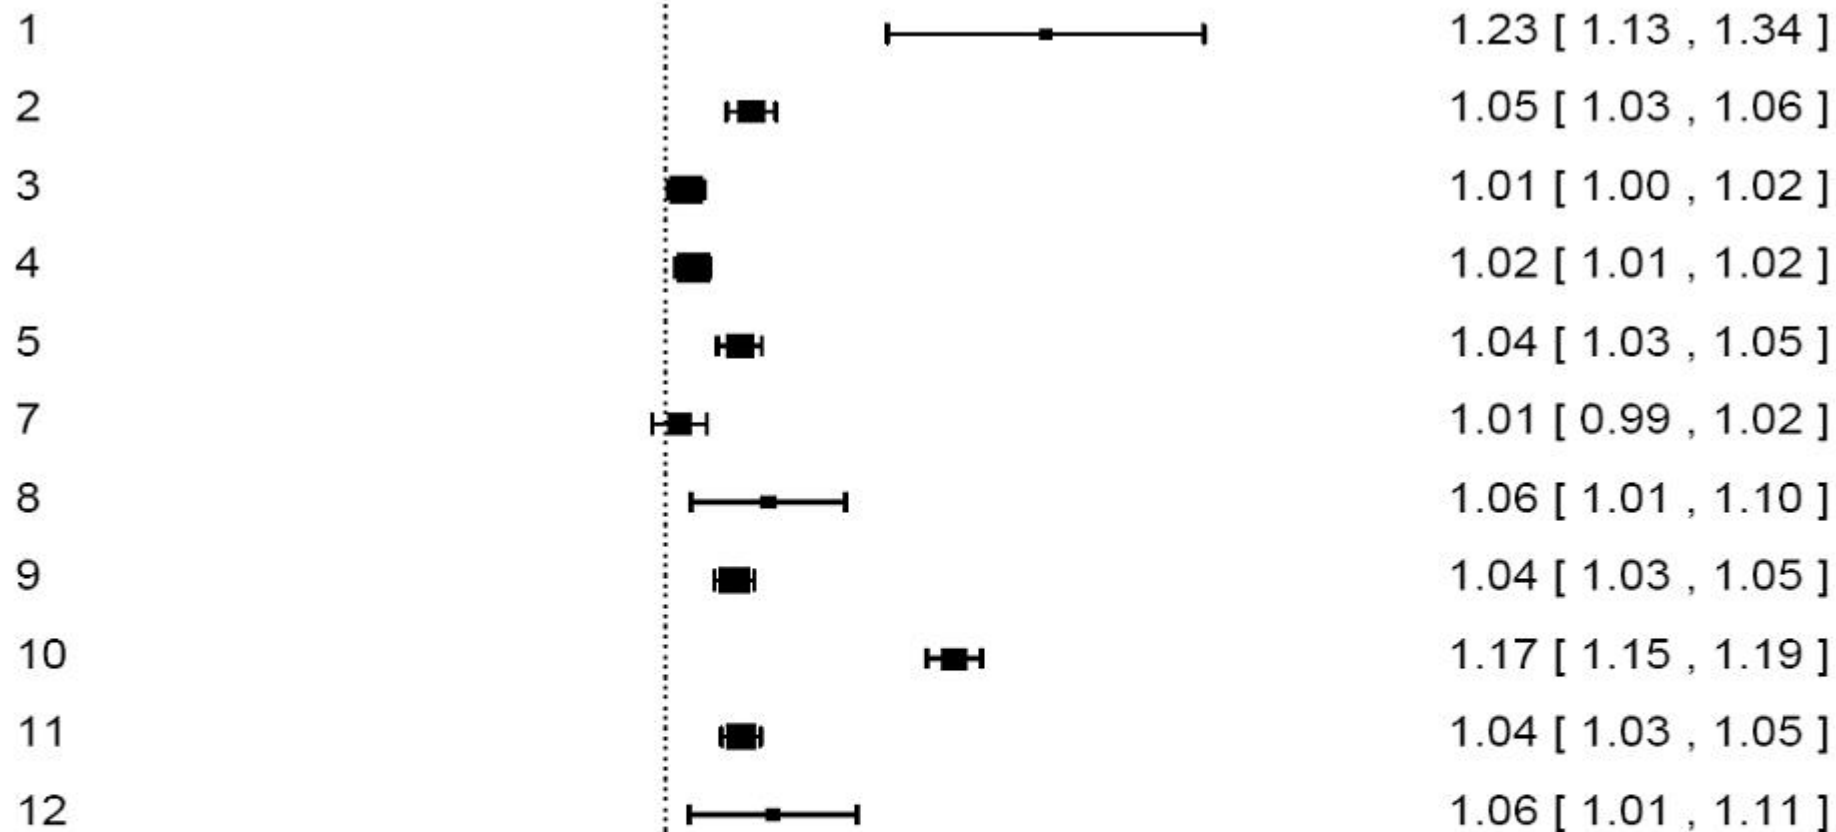

FE Model

1.04 [ 1.04 , 1.04 ]

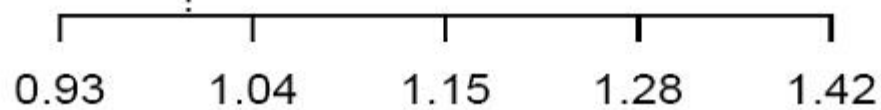

Odds ratio for time (per four weeks)

Supplement: MOESM3 [file 9630550]
